# Supplementary material for: MicroRNA339 Targeting PDXK Improves Motor Dysfunction and Promotes Neurite Growth in the Remote Cortex Subjected to Spinal Cord Transection
Source: PubMed Central journal article supplement (PMC7386314; doi:10.3389/fcell.2020.00577), 2020-07-21
Supplement: Data_Sheet_1.pdf [file Data_Sheet_1.pdf]

## *Supplementary Material*

### 1 Supplementary Tables

**Supplementary Table 1. Preparation of animal model and sample used.**

| Groups | Treatment         | Proteomics | WB/PCR |
|--------|-------------------|------------|--------|
| Sham   | Sham<br>operation | 5          | 6/6    |
| 3dpo   | SCT               | 5          | 6/0    |
| 14dpo  | SCT               | 5          | 6/0    |
| 28dpo  | SCT               | 5          | 6/6    |

SCT: Spinal cord transection; dpo: day post-operation; IF: Immunofluorescent staining; WB: Western Blot.

**Supplementary Table 2. Animal grouping and number in each test.**

| Groups           | Treatment             | BBB score | IF/WB |
|------------------|-----------------------|-----------|-------|
| Sham             | Sham<br>operation     | 9         | 3/6   |
| Negative-control | SCT+Lv-NC vector      | 9         | 3/6   |
| PDXK ORF         | SCT+ EX-Rn10146-Lv201 | 9         | 3/6   |

|            |                       |   |     |
|------------|-----------------------|---|-----|
| PDXK shRNA | SCT+ RSH051349-HIVmU6 | 9 | 3/6 |
| miR-339 KO | miR-339 knock out     | 9 | 0/0 |

BBB: Basso, Beattie, and Bresnehan; NC: Negative-control; SCT: Spinal cord transection; PDXK: Pyridoxal kinase.

**Supplementary Table 3. The details about the PDXK siRNA are showed as follows.**

| Name          | Catalog No     | Sense strand                  | Antisense strand              |
|---------------|----------------|-------------------------------|-------------------------------|
| Si-r-PDXK_001 | siG09102883915 | 5'GCAUGGUGGUGGAUAUCGU dTdT 3' | 3'dTdT CGUACCACCACCUAUAGCA 5' |
| Si-r-PDXK_002 | siG09102883902 | 5' GCAAACAAUGUCAACAAGU dTdT3' | 3'dTdT CGUUUGUUACAGUUGUUCA 5' |
| Si-r-PDXK_003 | siG09102883848 | 5'AGAACUCUCGACUCGUGUA dTdT 3' | 3'dTdT UCUUGAGAGCUGAGCACAU 5' |

PDXK: Pyridoxal kinas; No: Number; siRNA: small interference.

**Supplementary Table 4. Primers used in this experiment**

| Gene       | Primers                                                             |
|------------|---------------------------------------------------------------------|
| PDXK       | PDXK-3UTR-F:5'<br>CCGCTCGAGTGCCTTAGAGCCATGACTGAAAC 3'               |
|            | PDXK-3UTR-R:5' GAATGCGGCCGCTGGTGGATACTGAAACTG<br>3'                 |
| PDXK-Mut-2 | m-PDXK-mut-F610: 5'<br>GTTGGACAC <u>CAGACTCA</u> AGGAGAGACAGAGGT 3' |
|            | m-PDXK-mut-R632: 5'                                                 |

---

|            |                                              |
|------------|----------------------------------------------|
|            | TTAAAAGGT <u>TGAGTCTG</u> ACAGTGACCGCAT 3'   |
|            | m-PDXK-mut-F1026:5'                          |
| PDXK-Mut-3 | TTGGACAC <u>CAGACTCA</u> AGGAGAGACAGAGGT 3'  |
|            | m-PDXK-mut-R1047:5'                          |
|            | TCTCTCCT <u>TGAGTCTGT</u> GTCACACCCCTGTG 3'  |
|            | m-PDXK-mut-F610: 5'                          |
| PDXK-Mut-4 | GTTGGACAC <u>CAGACTCA</u> AGGAGAGACAGAGGT 3' |
|            | m-PDXK-mut-R1047:5'                          |
|            | TCTCTCCT <u>TGAGTCTGT</u> GTCACACCCCTGTG 3'  |

---

PDXK: Pyridoxal kinas.

**Supplementary Table 5. Differential proteins identified by spectrum analysis.**

---

| Spots | Protein Name                        | Accession GI | PI/MW (Observed) | PI/MW (Calculated) | Score | Sequence Coverage |
|-------|-------------------------------------|--------------|------------------|--------------------|-------|-------------------|
| 1     | Carbonic anhydrase 1                | 6264314<br>4 | 6.86/2828<br>2   | 6.05/2686<br>0     | 374   | 69%               |
| 3     | Protein carboxyl methyl transferase | 603467       | 7.14/2461<br>0   | 6.14/2212<br>0     | 167   | 46%               |
| 4     | Rieske Fe-S protein precursor       | 206681       | 8.90/2767<br>1   | 6.05/2227<br>0     | 432   | 31%               |

---

|    |                                      |              |                |                |     |     |
|----|--------------------------------------|--------------|----------------|----------------|-----|-----|
| 5  | NADH dehydrogenase                   | 2766116<br>5 | 5.87/2395<br>5 | 5.39/1768<br>0 | 177 | 53% |
| 6  | Glutamine synthetase                 | 121376       | 6.64/4224<br>0 | 6.35/3964<br>0 | 320 | 30% |
| 7  | Endoplasmic reticulum protein 29     | 1675884<br>8 | 6.23/2855<br>7 | 5.68/1501<br>0 | 254 | 38% |
| 9  | Peroxiredoxin 2                      | 8394432      | 5.34/2177<br>0 | 5.39/1471<br>0 | 109 | 31% |
| 10 | $\alpha$ -GDP dissociation inhibitor | 3198203<br>0 | 5.12/2339<br>3 | 5.38/2182<br>0 | 237 | 50% |
| 11 | Superoxide dismutase 2               | 8394331      | 8.96/2465<br>9 | 7.36/2827<br>0 | 377 | 49% |
| 17 | $\alpha$ -synuclein                  | 9507125      | 5.74/1450<br>6 | 5.17/3900<br>0 | 363 | 45% |
| 18 | LIM and SH3 protein 1                | 1424913<br>0 | 8.96/2465<br>9 | 7.36/2827<br>0 | 237 | 50% |
| 19 | Glutamate dehydrogenase 1            | 6980956      | 8.05/6137<br>7 | 8.95/5812<br>0 | 182 | 21% |
| 20 | Glutamine synthetase                 | 228136       | 6.38/4041<br>1 | 5.86/5145<br>0 | 301 | 24% |
| 21 | Dihydropyrimidinase-2                | 4025459<br>5 | 5.95/6223<br>9 | 5.72/6612<br>0 | 326 | 25% |

---

|    |                                     |               |                |                |     |     |
|----|-------------------------------------|---------------|----------------|----------------|-----|-----|
| 22 | Pridoxa kinase                      | 1392908<br>2  | 6.32/3488<br>6 | 5.69/3930<br>0 | 258 | 31% |
| 23 | Aldose reductase 1                  | 6978491       | 6.26/3577<br>4 | 5.81/4093<br>0 | 258 | 27% |
| 24 | Annexin V                           | 1421099       | 4.97/3540<br>1 | 5.27/3516<br>0 | 394 | 40% |
| 25 | Pyruvate kinase                     | 1675799<br>4  | 6.63/5778<br>1 | 5.93/6552<br>0 | 292 | 26% |
| 28 | 4-aminobutyrate<br>aminotransferase | 1220651<br>91 | 8.15/5641<br>9 | 6.11/5560<br>0 | 200 | 20% |
| 29 | Aconitase 2                         | 4053886<br>0  | 7.87/8538<br>0 | 7.16/7545<br>0 | 290 | 18% |
| 30 | 3-oxoacid coa transferase 1         | 1094660<br>92 | 8.70/5616<br>8 | 7.07/6152<br>0 | 349 | 29% |
| 31 | Transferrin                         | 6155698<br>6  | 7.14/7634<br>6 | 6.99/7515<br>0 | 60  | 12% |
| 32 | Purine-nucleoside<br>phosphorylase  | 3486968<br>3  | 6.46/3228<br>1 | 5.81/3086<br>0 | 283 | 44% |
| 33 | Synapsin I 1                        | 3335705<br>1  | 6.22/3501<br>4 | 5.91/6138<br>0 | 62  | 7%  |
| 34 | Malate dehydrogenase 1              | 1510017<br>9  | 6.16/3646<br>0 | 5.62/4108<br>0 | 164 | 12% |

---

|    |                                             |              |                |                |     |     |
|----|---------------------------------------------|--------------|----------------|----------------|-----|-----|
| 35 | Actin binding protein 1A                    | 1842683<br>4 | 6.05/5103<br>3 | 5.75/6360<br>0 | 49  | 8%  |
| 36 | $\beta$ -Guanine nucleotide-binding protein | 1393739<br>1 | 5.60/3730<br>7 | 5.50/3916<br>0 | 87  | 12% |
| 37 | Aconitase 2                                 | 4053886<br>0 | 7.87/8538<br>0 | 7.16/7546<br>0 | 245 | 16% |

6 and 20 are the same protein, 29 and 37 are the same protein that was identified in different gel which indicate that tandem mass spectrometry identification technology is reliable in this experiment.

### Supplemental mass spectrum data 1

#### PMF

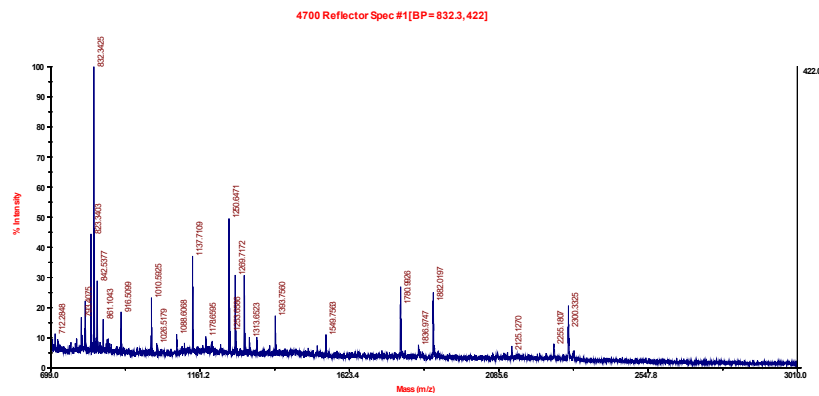

#### MSMS

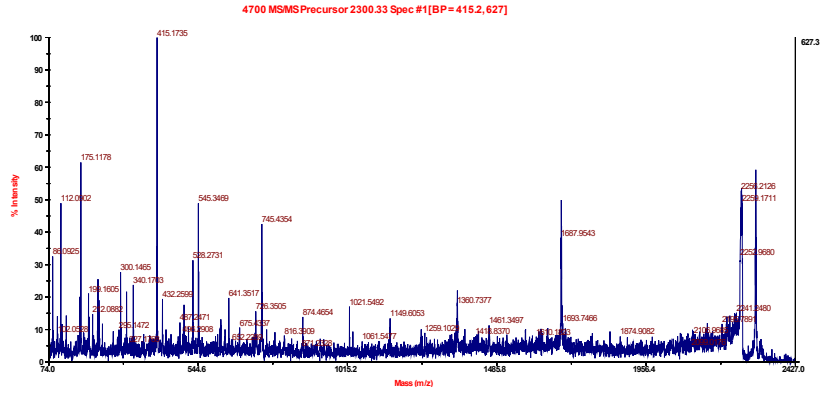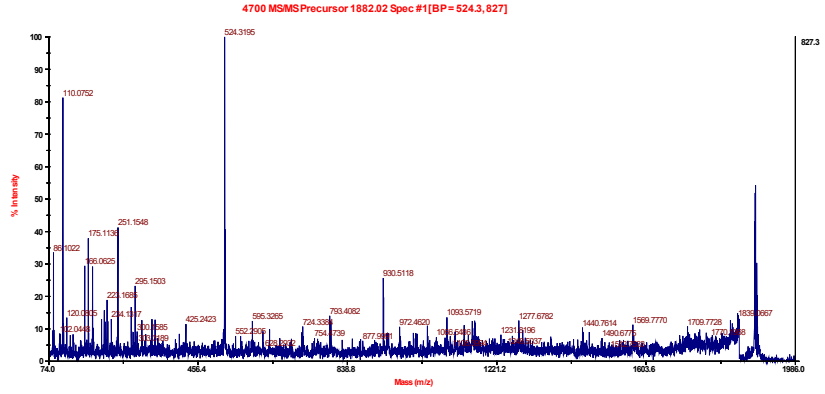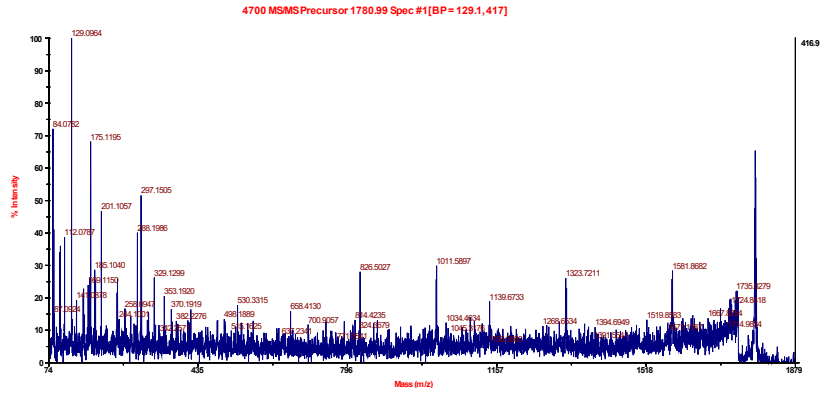

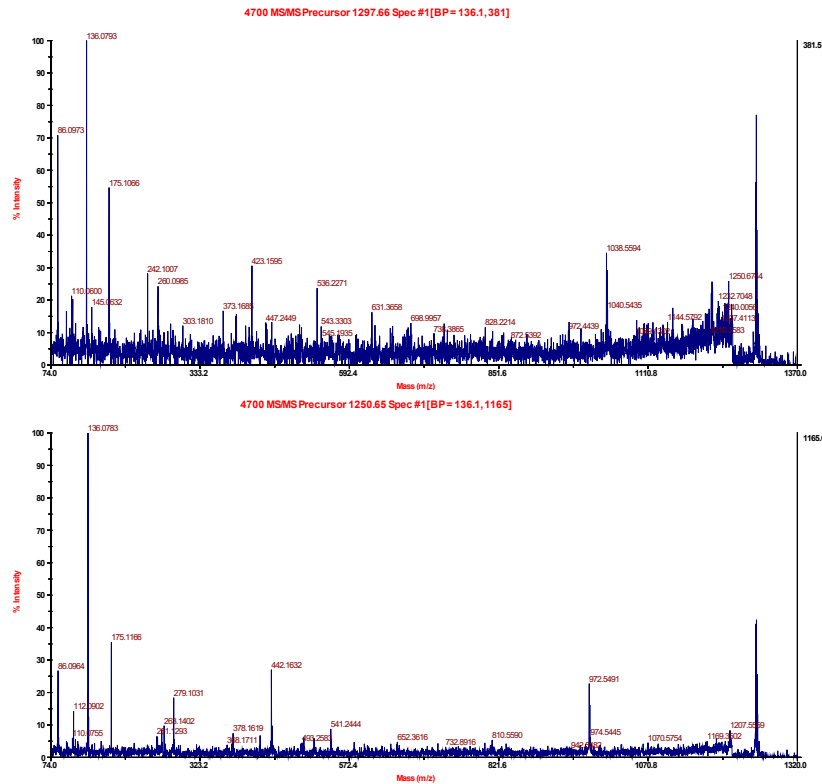

### Mass Spectrometry information of PDXK (NO.22 spot)

Table S6 list the potential protein that identified by Mass Spectrometry on 4700 Proteomics Analyzer. Pyridoxal kinase (PDXK), which the Probability Based Mowse Score was 258 (greater than 56 means significant), was accepted; Table S7 shows 12 peptides of PDXK were identified by Mass Spectrometry. The peptide mass fingerprinting (PMF) is as follows. Matched and no matched peaks are also listed in Table S6. Tandem mass spectrometry (MS/MS) confirmed the “2300.33” peptide (140-160), “1882.02” peptide (162-177), “1780.99” peptide (276-292), “1297.66” peptide (195-206) and 1250.65 peptide (77-86); and the ions score is 56, 40, 28, 23, 29, respectively. For each PMF and MS/MS picture, we could use mouse to drag the pictures to their clearly size.

### Supplementary Table 6. List of potential protein (No.1 was accepted).

| NO | Accession | Mass | Score | Description |
|----|-----------|------|-------|-------------|
|----|-----------|------|-------|-------------|



|    |             |       |     |                                                                                 |
|----|-------------|-------|-----|---------------------------------------------------------------------------------|
| 1  | gi 13929082 | 34886 | 258 | pyridoxal (pyridoxine, vitamin B6) kinase                                       |
| 2  | gi 62665802 | 34890 | 255 | PREDICTED: similar to pyridoxal (pyridoxine, vitamin B6) kinase                 |
| 3  | gi 9506507  | 53811 | 38  | coronin, actin-binding protein, 1B                                              |
| 4  | gi 28381370 | 11564 | 37  | Protein KIAA1688 homolog (Preoptic regulatory factor 2) (PORF-2)                |
| 5  | gi 539953   | 21207 | 32  | enhancer factor I chain A-D                                                     |
| 6  | gi 559637   | 4391  | 30  | nuclear orphan receptor HZF-1=glucocorticoid/mineralocorticoid receptor homolog |
| 7  | gi 11321107 | 5912  | 28  | p53 tumor suppressor                                                            |
| 8  | gi 66730402 | 10119 | 28  | p300/CBP-associated factor                                                      |
| 9  | gi 8307696  | 20817 | 27  | alpha-2u globulin                                                               |
| 10 | gi 57528321 | 62681 | 27  | RIO kinase 2                                                                    |

**Supplementary Table 7. The details about the PDXK are showed as follows.**

| Observed | Mr(expt) | Mr(calc) | Delta | Start - End | Miss | Ions | Peptide(Matched peptides shown in Bold Red) | M |
|----------|----------|----------|-------|-------------|------|------|---------------------------------------------|---|
| 1137.71  | 1136.70  | 1136.67  | 0.04  | 7-16        | 0    | ---  | R.VLSIQSHVVR.G                              | Y |
| 1250.65  | 1249.64  | 1249.60  | 0.04  | 77-86       | 0    | 29   | K.YDYVLTGYTR.D                              |   |

## Supplementary Material

|         |         |         |      |          |   |     |                           |     |
|---------|---------|---------|------|----------|---|-----|---------------------------|-----|
| 1250.65 | 1249.64 | 1249.60 | 0.04 | 77-86    | 0 | --- | K.YDYVLTGYTR.D            | Y   |
| 1269.72 | 1268.71 | 1268.67 | 0.04 | 259-269  | 0 | --- | K.TVSAMQHVLQR.T           | YES |
| 1297.66 | 1296.66 | 1296.61 | 0.04 | 195-206  | 0 | 23  | K.GSDYLMALGSQR.M          |     |
| 1297.66 | 1296.66 | 1296.61 | 0.04 | 195-206  | 0 | --- | K.GSDYLMALGSQR.M          | Y   |
| 1780.99 | 1779.99 | 1779.91 | 0.07 | 276-292  | 0 | 28  | K.AEAGEGQKPSPAQLELR.M     |     |
| 1780.99 | 1779.99 | 1779.91 | 0.07 | 276- 292 | 0 | --- | K.AEAGEGQKPSPAQLELR.M     | Y   |
| 1882.02 | 1881.01 | 1880.92 | 0.09 | 162-177  | 0 | 40  | K.IHSQEEAFVMDVLHR.M       |     |
| 1882.02 | 1881.01 | 1880.92 | 0.09 | 162-177  | 0 | --- | K.IHSQEEAFVMDVLHR.M       | Y   |
| 2300.33 | 2299.33 | 2299.19 | 0.14 | 140-160  | 0 | 56  | K.VVPMADIITPNQFEAELLSGR   |     |
| 2300.33 | 2299.33 | 2299.19 | 0.14 | 140-160  | 0 | --- | K.VVPMADIITPNQFEAELLSGR.K | Y   |

PDXK: Pyridoxal kinas;

**No match to:** 793.41, 804.31, 805.54, 823.34, 832.34, 861.10, 916.51, 1010.59, 1393.75, 1549.75

## 2 Supplementary Figures

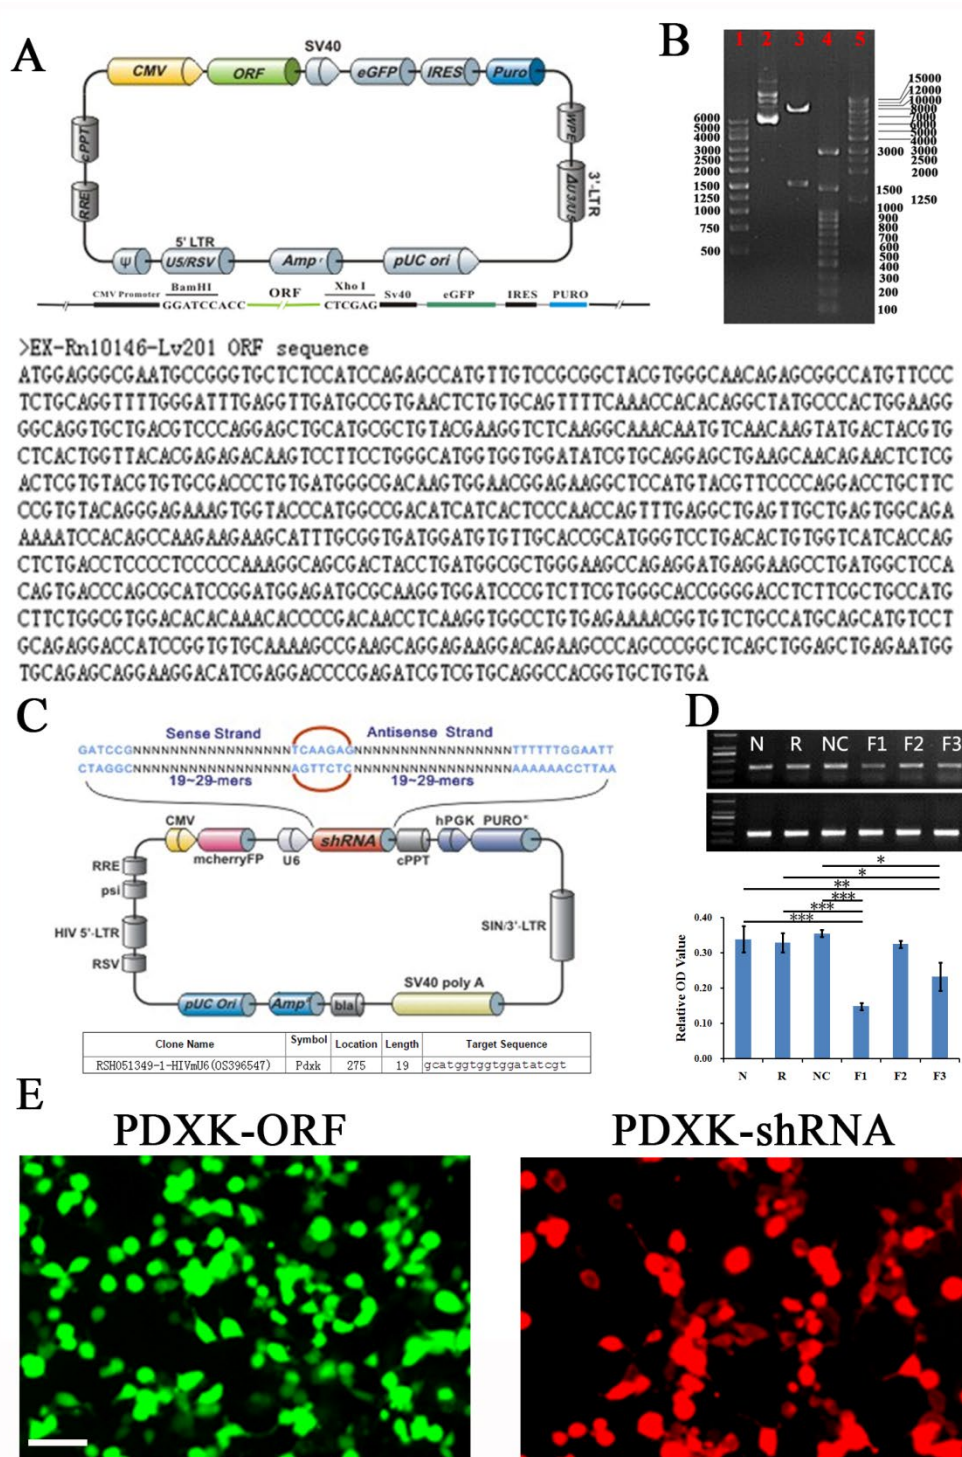

**Supplementary Figure 1. PDXK-ORF/shRNA Lentivirus construction and Packaging. (A)** Lentivirus plasmid information of EX-Rn10146-Lv201, including ORF sequence and restriction enzyme sites. CMV is the promoter of SNCA and EGFP is reporter gene. Puromycin and ampicillin are stable selection marker. **(B)** EX-Rn10146-Lv201 plasmid was digested by EcoRI and XhoI

restriction enzyme and run on 1.0% agarose gel. Lane1: DNA Ladder 6000. Lane2: EX-Rn10146-Lv201 plasmids. Lane3: EX-Rn10146-Lv201 plasmids were digested by EcoRI and XhoI. There are two expected bands (~1578/7963bp). Lane4: DNA ladder 3000. Lane5: DNA ladder 15000.C Lentivirus plasmid information of RSH051349-HIVmU6 and its interference sequence. CMV is the promoter and mcherryFP is reporter gene. Puromycin and ampicillin are stable selection marker. **(D)** The interference effectiveness of PDXK-siRNA was verified by RT-PCR in PC12 cells. N normal cells, R add transfection reagent into culture medium, NC random sequence added into culture medium, F1-3, add transfection reagent and one of three PDXK-siRNA fragment. The expression of PDXK was analyzed by Image J software and quantified, which suggested that F1 PDXK-siRNA was the most effective. Data were presented as mean  $\pm$ SEM. \* $p < 0.05$  vs. normal. **(E)** EGFP (PDXK-ORF) and mcherryFP (PDXK-shRNA) are visualized under fluorescent microscope indicating successful packaging in 293T $\alpha$  cells. Scale bar= 50 $\mu$ m.

| Score           | Expect                                                        | Identities     | Gaps       | Strand    |
|-----------------|---------------------------------------------------------------|----------------|------------|-----------|
| 4460 bits(2415) | 0.0                                                           | 2417/2418(99%) | 0/2418(0%) | Plus/Plus |
| Query 1         | TGCCTTAGAGCCATGACTGAAACTCGACATCCGTTCCCTCCCGAGAGTGGGTCTCAG     | 60             |            |           |
| Sbjet 75        | TGCCTTAGAGCCATGACTGAAACTCGACATCCGTTCCCTCCCGAGAGTGGGTCTCAG     | 134            |            |           |
| Query 61        | CCAGTCTCTAGCGTGAAAAATGTGCCATTGTGCTA+++++AAAAATGACAAAGCCGT     | 120            |            |           |
| Sbjet 135       | CCAGTCTCTAGCGTGAAAAATGTGCCATTGTGCTA+++++AAAAATGACAAAGCCGT     | 194            |            |           |
| Query 121       | CGTAGAAATGTGTGATTACAAACCATGGTCCCTCCCAAGGCCCTGGGCTCTGACTG      | 180            |            |           |
| Sbjet 195       | CGTAGAAATGTGTGATTACAAACCATGGTCCCTCCCAAGGCCCTGGGCTCTGACTG      | 254            |            |           |
| Query 181       | CCTCATGTTGCCTCATAGGTATGTGGAAGGTAGGTGGAGGAGACCAGCCTGCTGCCCTCG  | 240            |            |           |
| Sbjet 255       | CCTCATGTTGCCTCATAGGTATGTGGAAGGTAGGTGGAGGAGACCAGCCTGCTGCCCTCG  | 314            |            |           |
| Query 241       | GACCTTTCTGTTGGTCACTGGCTGCCATTGCCCCCTGTGTATGTATACACAGTCCTGATT  | 300            |            |           |
| Sbjet 315       | GACCTTTCTGTTGGTCACTGGCTGCCATTGCCCCCTGTGTATGTATACACAGTCCTGATT  | 374            |            |           |
| Query 301       | GTGTATAGACTCTGCCGTGTGGCGCTGTCTTTAAAATGGGTTAGGTCTTAACCGTTG     | 360            |            |           |
| Sbjet 375       | GTGTATAGACTCTGCCGTGTGGCGCTGTCTTTAAAATGGGTTAGGTCTTAACCGTTG     | 434            |            |           |
| Query 361       | GCATTGGAAGAAATATGCCAAATATCTCTTTGCCATTCTGGTCTTCCCTTGTCTCTGC    | 420            |            |           |
| Sbjet 435       | GCATTGGAAGAAATATGCCAAATATCTCTTTGCCATTCTGGTCTTCCCTTGTCTCTGC    | 494            |            |           |
| Query 421       | ATTAGAGTTTCTGTCTCTCTGCTCTTTGGTGGTGTCCAGAAATGTCAGACGAATGC      | 480            |            |           |
| Sbjet 495       | ATTAGAGTTTCTGTCTCTCTGCTCTTTGGTGGTGTCCAGAAATGTCAGACGAATGC      | 554            |            |           |
| Query 481       | AGCTGCTGGTCTGCGAGGGAAGGTTTCATATCCCGTCTTGCACAGCATGCGGTCACT     | 540            |            |           |
| Sbjet 555       | AGCTGCTGGTCTGCGAGGGAAGGTTTCATATCCCGTCTTGCACAGCATGCGGTCACT     | 614            |            |           |
| Query 541       | GTGACAGGACCTTTTAAGGAACGGGAACATCCAGGACATCTGCAAGCCGTCTGGGTGT    | 600            |            |           |
| Sbjet 615       | GTGACAGGACCTTTTAAGGAACGGGAACATCCAGGACATCTGCAAGCCGTCTGGGTGT    | 674            |            |           |
| Query 601       | CTGCAGGGTCTCCTGTAACCTCTGGAGCTGAGTGCAGGGCAGCTTGGGAATTCAGGGAAGT | 660            |            |           |
| Sbjet 675       | CTGCAGGGTCTCCTGTAACCTCTGGAGCTGAGTGCAGGGCAGCTTGGGAATTCAGGGAAGT | 734            |            |           |
| Query 661       | TTGCCTCACTGGGC+++++TTTTGGTTTGGTTTGGTTTGAITTTTCAAGACA          | 720            |            |           |
| Sbjet 735       | TTGCCTCACTGGGC+++++TTTTGGTTTGGTTTGGTTTGAITTTTCAAGACA          | 794            |            |           |

**Supplementary Figure 2.** The matching rate of PDXK 3'UTR sequence and the sequencing results was 99% by using blast software, which indicated the recombination of hRluc-PDXK 3'UTR

plasmid is successful. These experiments and data analysis were performed by Shanghai Biotechnology Co., Ltd. (Shanghai, China).

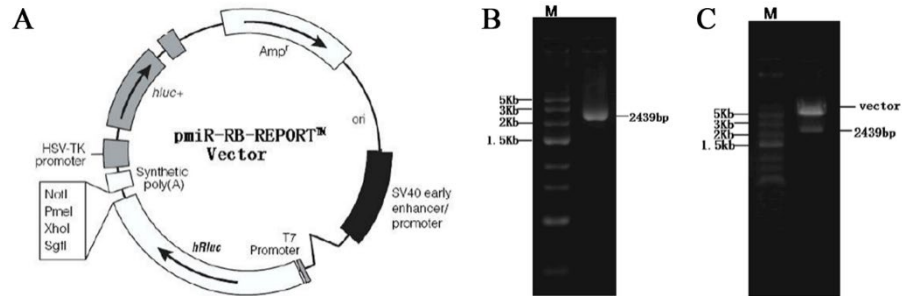

**Supplementary Figure 3. Verification of PDXK 3'UTR mutant.** (A) The vector of PDXK 3'UTR mutant. (B) The electrophoresis of PDXK. M: marker 5000. (C) Validation of plasmid enzyme digestion. M: marker 5000

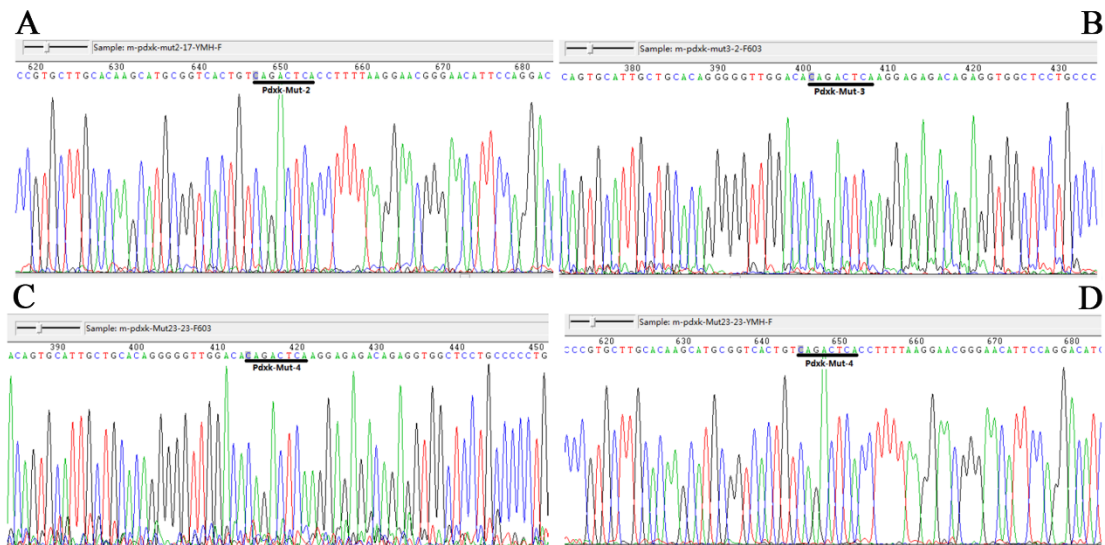

**Supplementary Figure 4. The sequencing mapping of PDXK 3'UTR mutant.** (A) The sequencing mapping of PDXK 3'UTR -Mut-2. (B) The sequencing mapping of PDXK 3'UTR -Mut-3. (C, D) The sequencing mapping of PDXK3'UTR -Mut-4

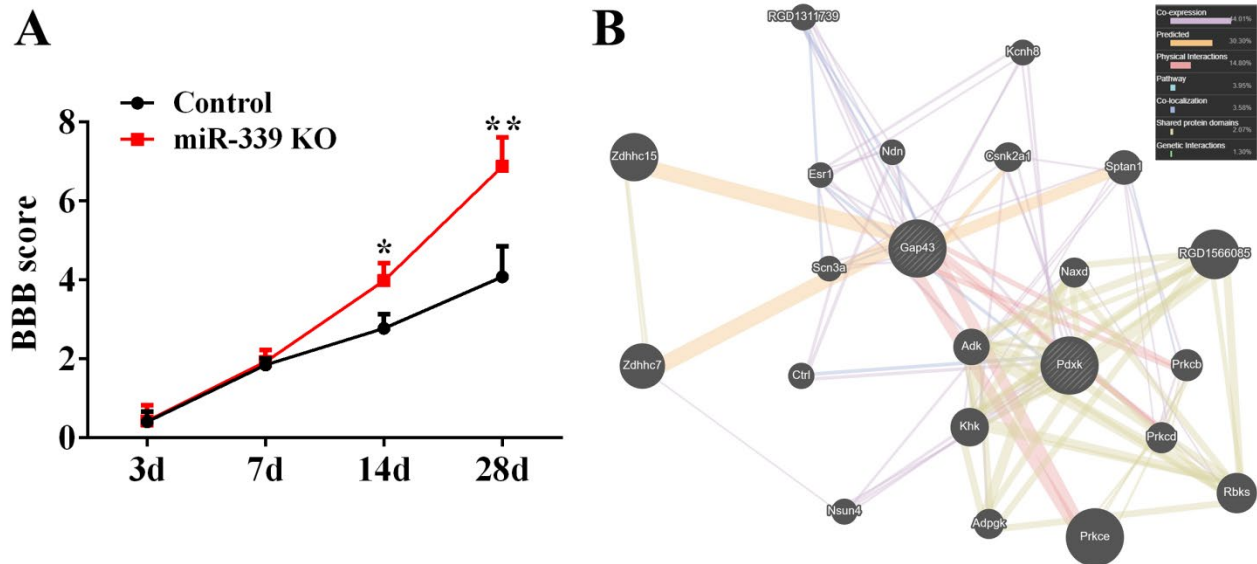

**Supplementary Figure 5. The role of miR-339 knock-out in the functional recovery after SCT in rats and bioinformatics prediction with GAP43.** (A) The locomotor function was assessed by BBB score between control group and miR-339 knock out group at 3 d, 7 d, 14 d and 28 d after SCT. Data were exhibited as mean  $\pm$  SD. \* $P < 0.05$ , \*\* $P < 0.01$ . (B) PDXK is associated with GAP43 in SCT rats. The potential relation between PDXK and GAP43 was predicted by GeneMANIA (<http://genemania.org/>). Bioinformatics prediction revealed that there is a co-expression and direct relation between PDXK and GAP43. BBB=Basso, Beattie, and Bresnehan. KO = knock out. PDXK = Pyridoxal kinase. GAP43 = Growth associated protein-43. d = Day.
